# Supplementary material for: Motivators and Barriers to Living Donor Kidney Transplant as Perceived by Past and Potential Donors
Source: PubMed Central journal article supplement (PMC9677302; doi:10.1177/20543581221137179), 2022-11-19
Supplement: sj-pdf-1-cjk-10.1177_20543581221137179.pdf [file sj-pdf-1-cjk-10.1177_20543581221137179.pdf]

**Table 1. Study Cohort Demographics**

|                            | Total<br>(N=) | Gender       |                |
|----------------------------|---------------|--------------|----------------|
|                            |               | Male<br>(N=) | Female<br>(N=) |
| <b>Age Group</b>           |               |              |                |
| 18-30                      | 9 (6.5%)      | 4 (8.3%)     | 5 (5.6%)       |
| 31-40                      | 15 (10.9%)    | 3 (6.3%)     | 12 (13.3%)     |
| 41-50                      | 29 (21.0%)    | 5 (10.4%)    | 24 (26.7%)     |
| 51-60                      | 34 (24.6%)    | 12 (25%)     | 22 (24.4%)     |
| >60                        | 49 (35.5%)    | 23 (47.9%)   | 26 (28.9%)     |
| <b>Race</b>                |               |              |                |
| Caucasian                  | 126 (91.3%)   | 43 (89.6%)   | 83 (92.2%)     |
| Indigenous                 | 3 (2.2%)      | 1 (2.1%)     | 2 (2.2%)       |
| Asian                      | 6 (4.3%)      | 3 (6.3%)     | 3 (3.3%)       |
| Black                      | 1 (0.7%)      | 0            | 1 (1.1%)       |
| Middle Eastern             | 2 (1.4%)      | 1 (2.1%)     | 1 (1.1%)       |
| <b>Born in Canada</b>      |               |              |                |
| Yes                        | 117 (85.4%)   | 40 (83.3%)   | 77 (86.5%)     |
| No                         | 20 (14.6%)    | 8 (16.7%)    | 12 (13.5%)     |
| <b>Relationship Status</b> |               |              |                |
| In a relationship          | 106 (76.8%)   | 41 (85.4%)   | 65 (72.2%)     |
| Single                     | 18 (13.0%)    | 4 (8.3%)     | 14 (15.6%)     |
| Divorced/Separated         | 13 (9.4%)     | 3 (6.3%)     | 10 (11.1%)     |
| Widowed                    | 1 (0.7%)      | --           | 1 (1.1%)       |
| <b>Sexual Orientation</b>  |               |              |                |
| Heterosexual               | 130 (94.2%)   | 44 (91.7%)   | 86 (95.6%)     |
| LGBTQ                      | 6 (4.3%)      | 3 (6.3%)     | 3 (3.3%)       |
| <b>Education</b>           |               |              |                |
| Less than Highschool       | 3 (2.2%)      | 1 (2.1%)     | 2 (2.2%)       |
| Highschool Diploma         | 15 (10.9%)    | 9 (18.8%)    | 6 (6.7%)       |
| Some Post-Secondary        | 58 (42.3%)    | 22 (45.8%)   | 36 (40%)       |
| Bachelor's Degree          | 32 (23.4%)    | 7 (14.6%)    | 25 (27.8%)     |
| Postgraduate Degree*       | 29 (21.2%)    | 9 (18.8%)    | 20 (22.2%)     |
| <b>Current Employment</b>  |               |              |                |
| Working                    | 93 (67.4%)    | 28 (58.3%)   | 65 (72.2%)     |
| Retired                    | 36 (26.1%)    | 18 (37.5%)   | 18 (20%)       |
| Other**                    | 9 (6.5%)      | 2 (4.2%)     | 7 (7.8%)       |
| <b>Children</b>            |               |              |                |
| Yes                        | 96 (69.6%)    | 32 (66.7%)   | 64 (71.1%)     |
| No                         | 42 (30.4%)    | 16 (33.3%)   | 26 (28.9%)     |
| <b>Personal Income</b>     |               |              |                |
| <15K                       | 34 (24.6%)    | 3 (6.3%)     | 8 (8.9%)       |
| 16-30K                     | 19 (13.8%)    | 5 (10.4%)    | 14 (15.6%)     |
| 31-50K                     | 32 (23.2%)    | 8 (16.7%)    | 24 (26.7%)     |
| 51-75K                     | 35 (25.4%)    | 18 (37.5%)   | 17 (18.9%)     |
| 76-90K                     | 17 (12.3%)    | 4 (8.3%)     | 13 (14.4%)     |

|                         |            |            |            |
|-------------------------|------------|------------|------------|
| >90K                    | 23 (16.7)  | 10 (20.8%) | 13 (14.4%) |
| <b>Household Income</b> |            |            |            |
| <15K                    | 2 (1.4%)   | 1 (2.1%)   | 1 (1.1%)   |
| 16-30K                  | 5 (3.6%)   | 1 (2.1%)   | 4 (4.4%)   |
| 31-50K                  | 23 (16.7%) | 6 (12.5%)  | 17 (18.9%) |
| 51-75K                  | 34 (24.6%) | 14 (29.2%) | 20 (22.2%) |
| 76-90K                  | 21 (15.2%) | 9 (18.8%)  | 12 (13.3%) |
| >90K                    | 50 (36.2%) | 17 (35.4%) | 33 (36.7%) |
| Donation Status         |            |            |            |
| Potential donors        |            |            |            |
|                         |            |            |            |

\* *Includes Masters, Professional Degree, Doctorate*

\*\* *Includes unemployed and looking for work, unemployed and not looking for work, and other*

**Figure 1. Personal Income & Employment Industry**

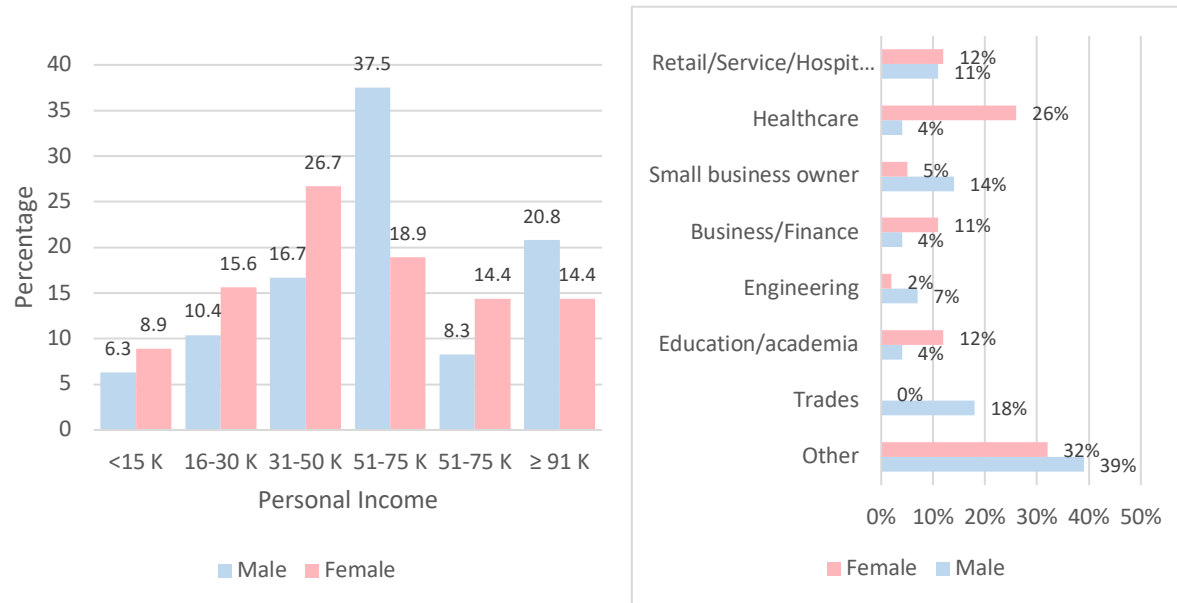

\*Excluded individuals with no response for personal income (N=1)

**Figure 2A: Motivators and Barriers in relation to the Decision Making and Evaluation Process**

*Pink shaded bars represent female respondents and blue shaded bars represent male respondents.*

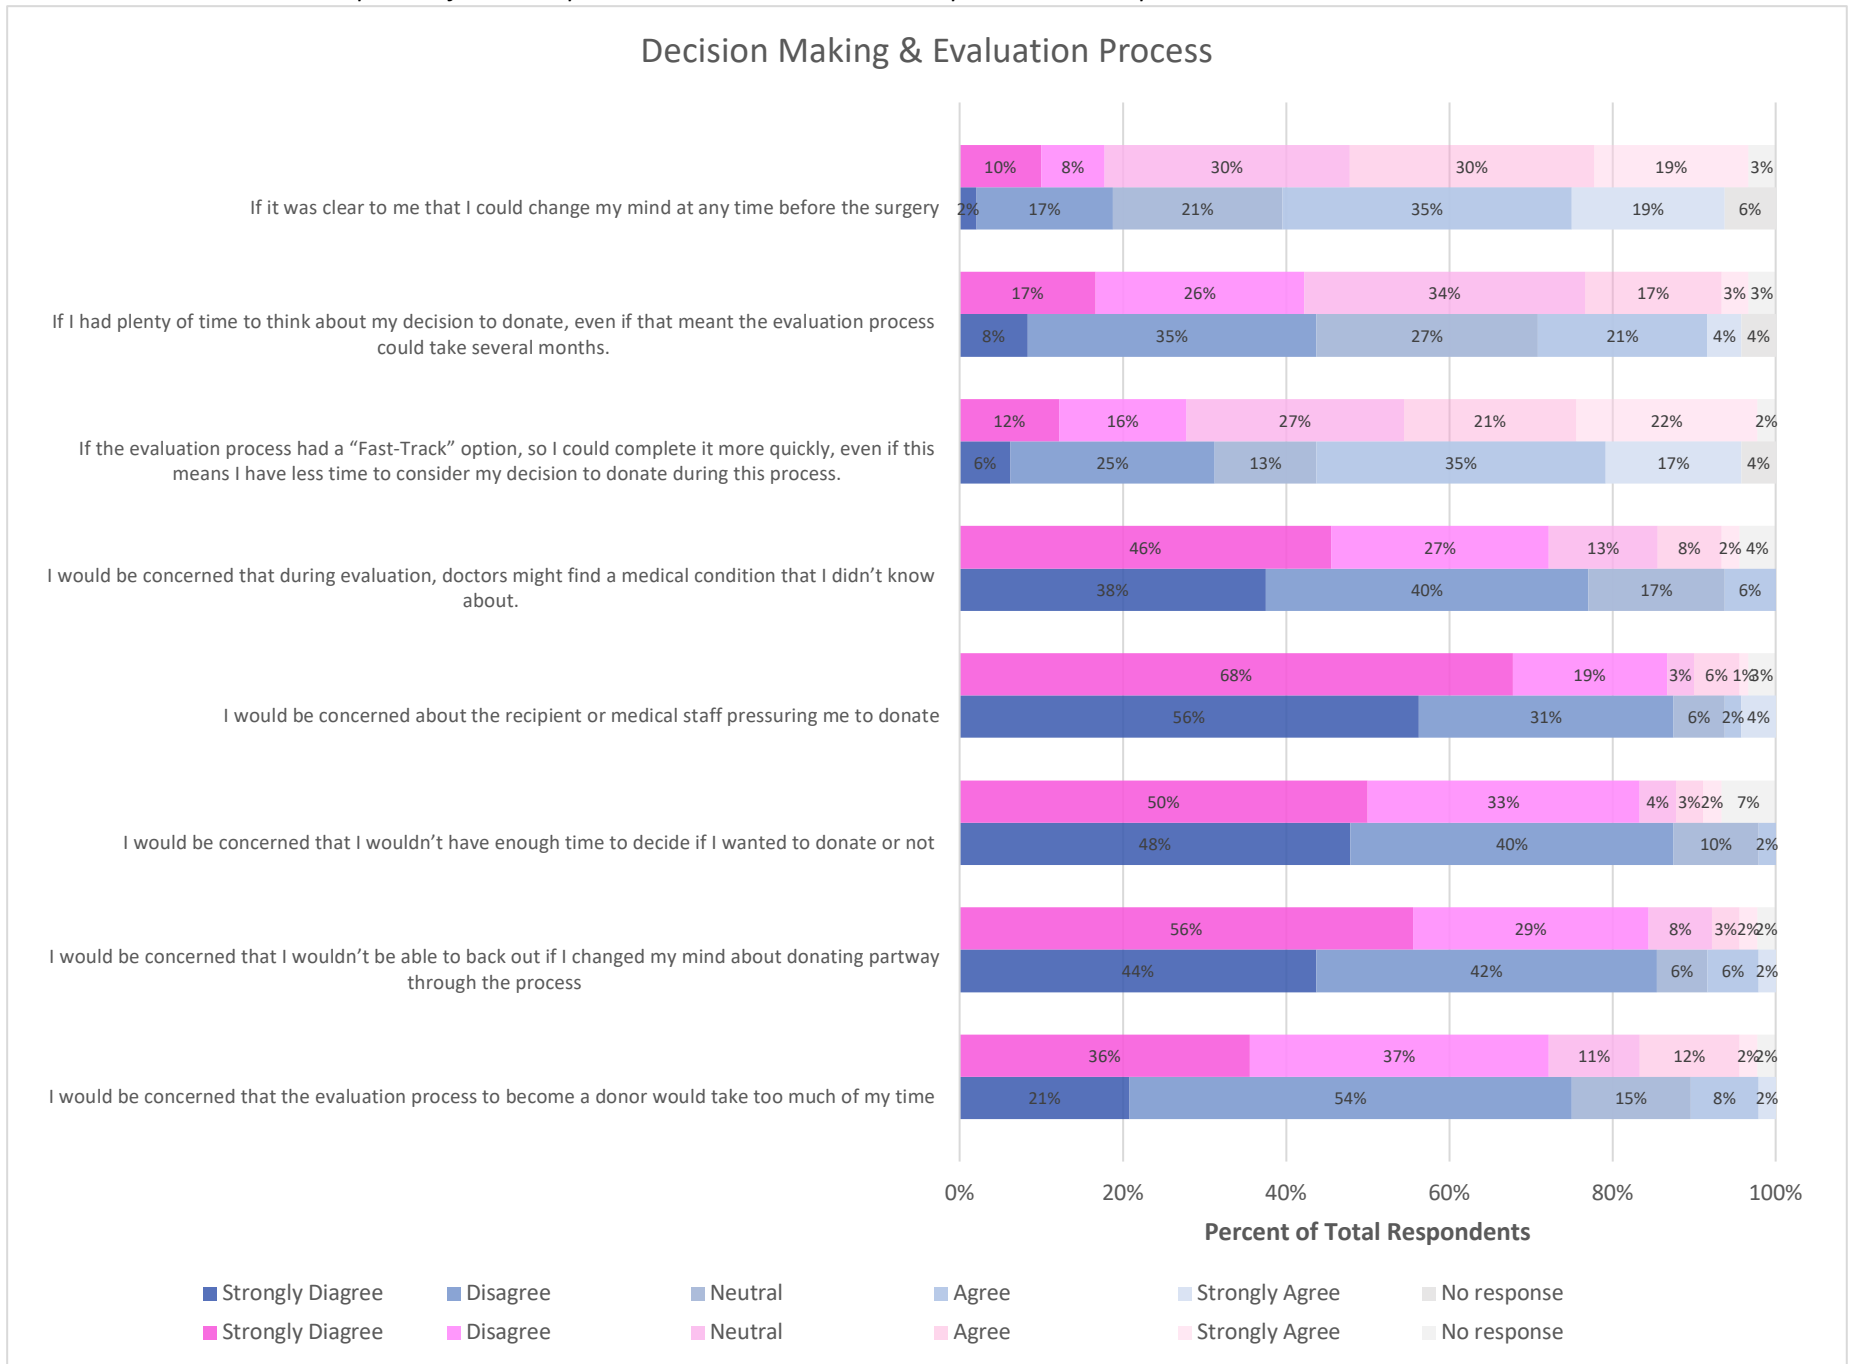

**Figure 2B: Motivators and Barriers in relation to Family Pressures and Domestic Responsibilities**  
*Pink shaded bars represent female respondents and blue shaded bars represent male respondents.*

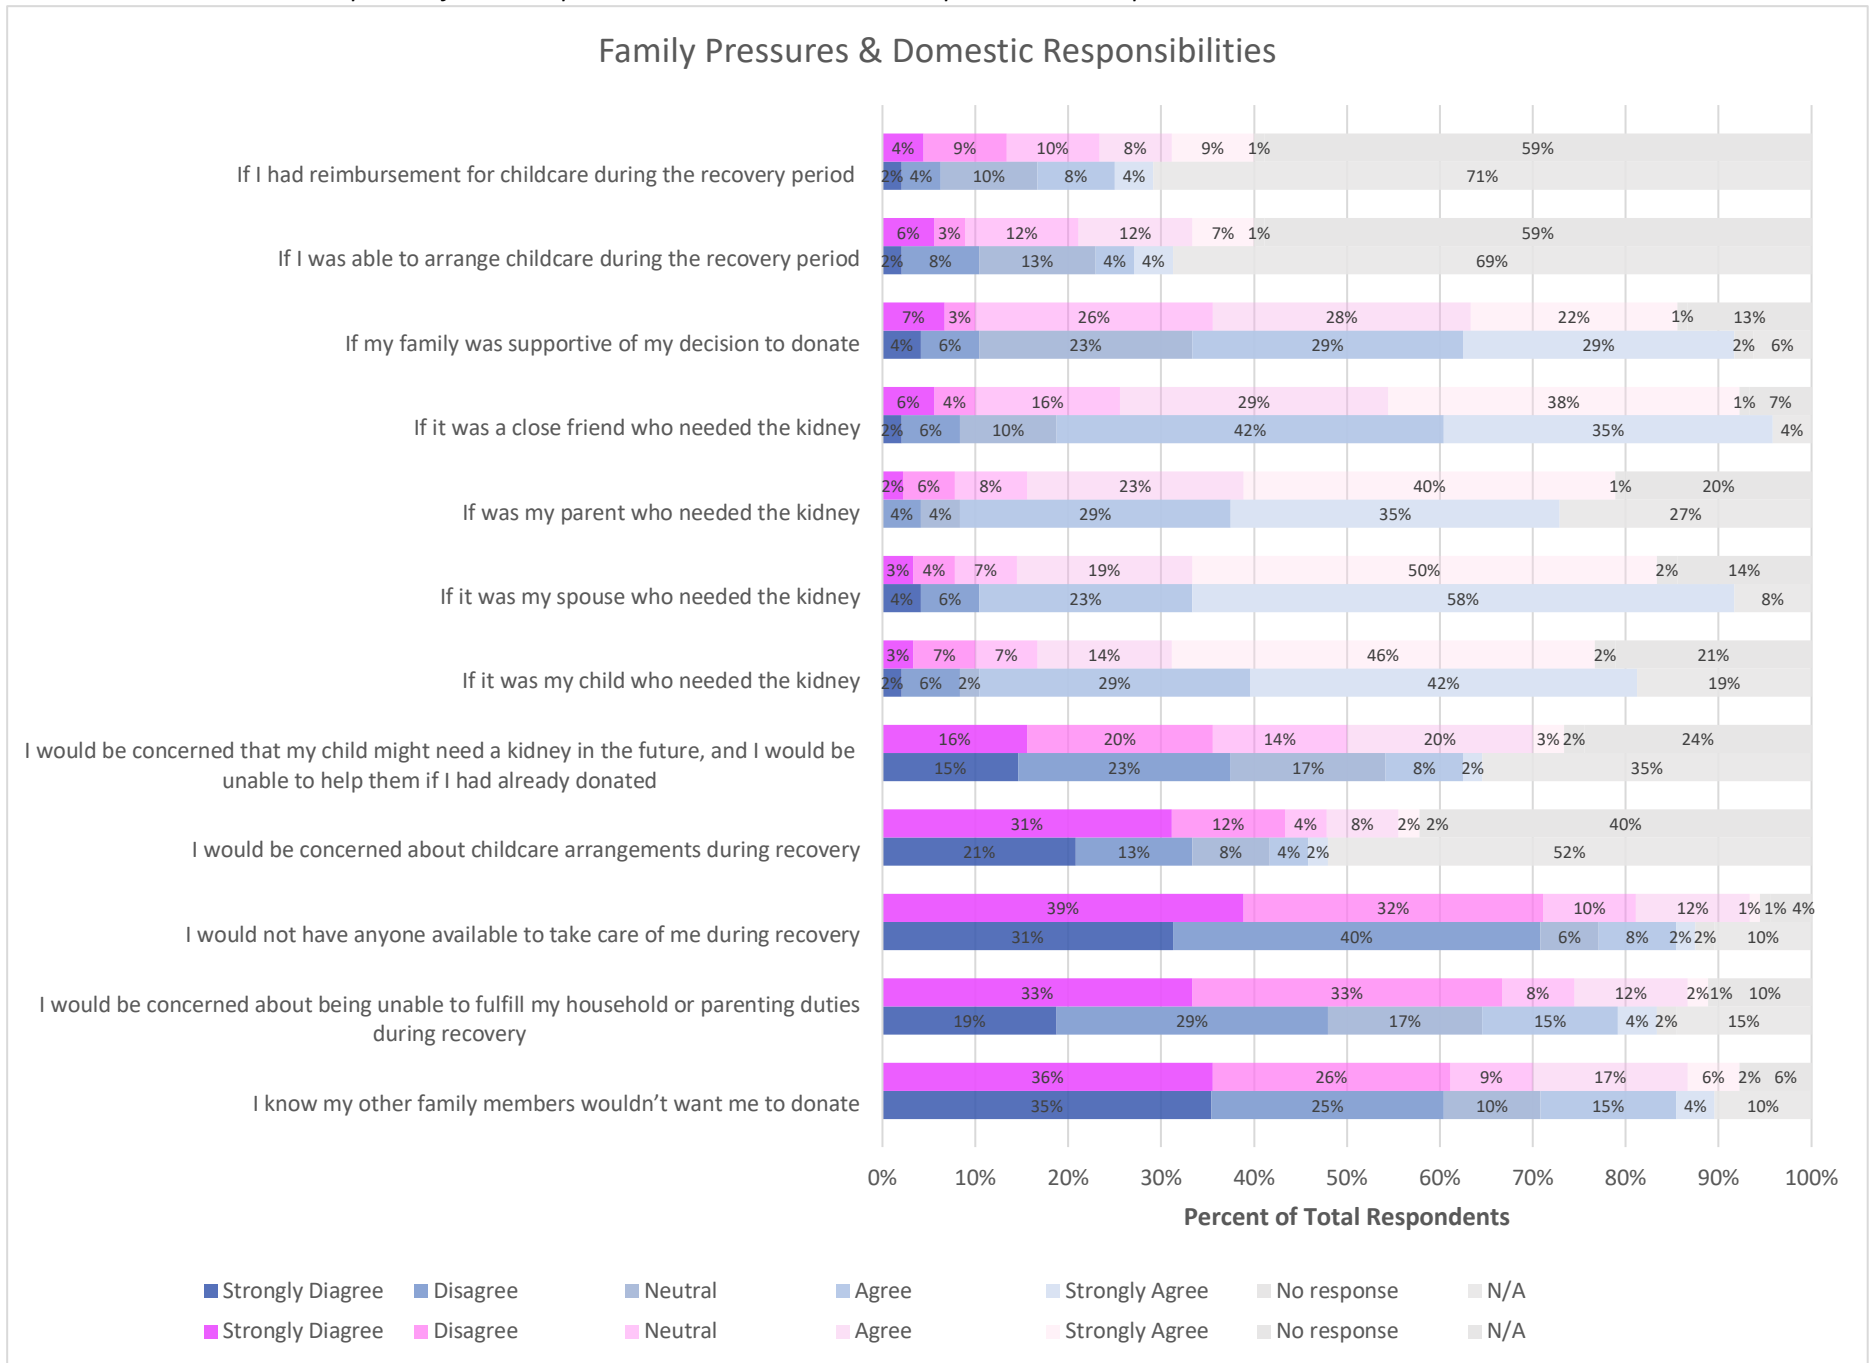

**Figure 2C: Motivators and Barriers in relation to Finances and Job Security**

*Pink shaded bars represent female respondents and blue shaded bars represent male respondents.*

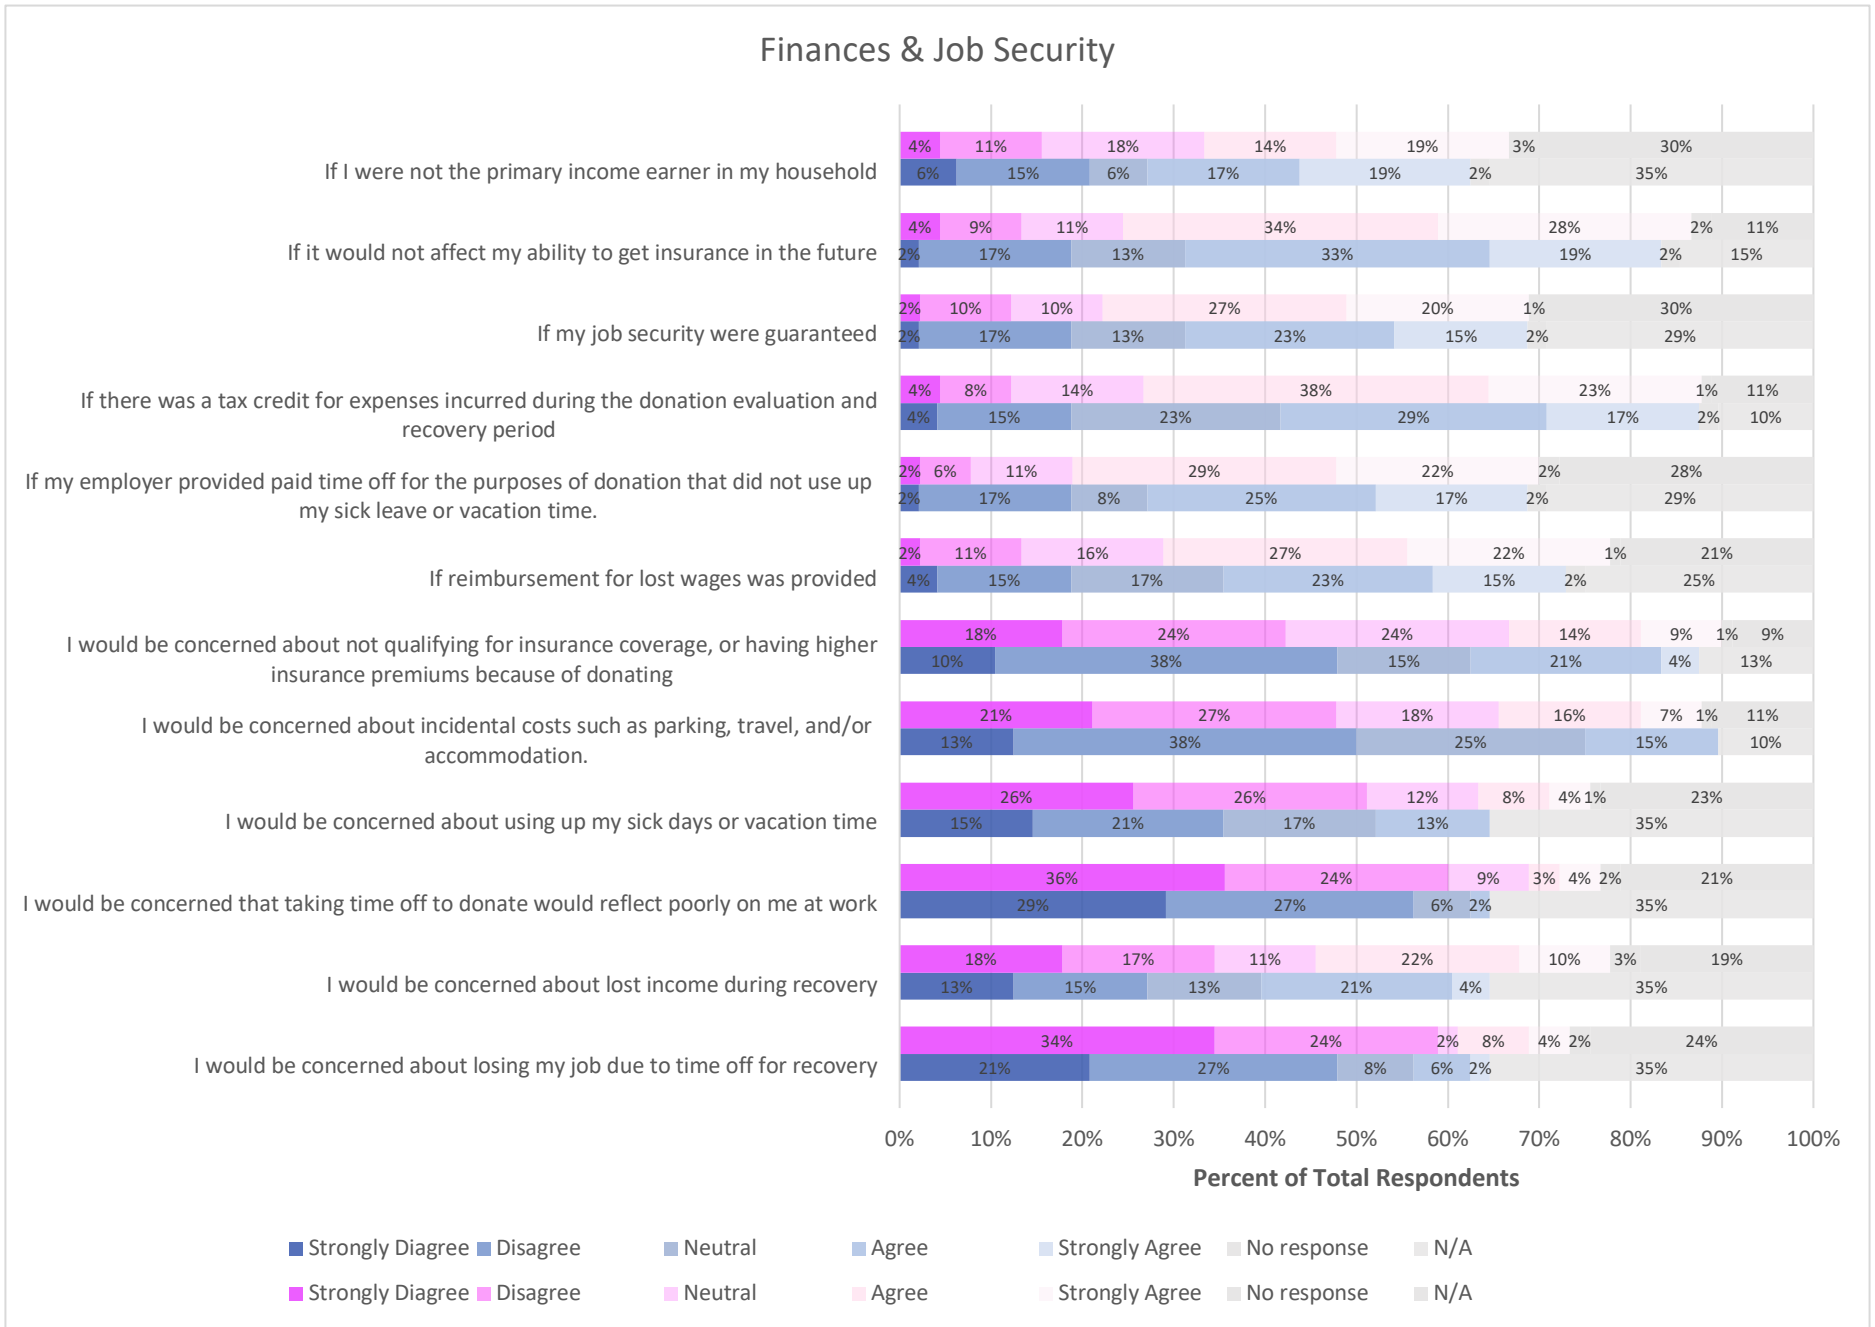

**Figure 2D: Motivators and Barriers in relation to the Recovery Process**

*Pink shaded bars represent female respondents and blue shaded bars represent male respondents.*

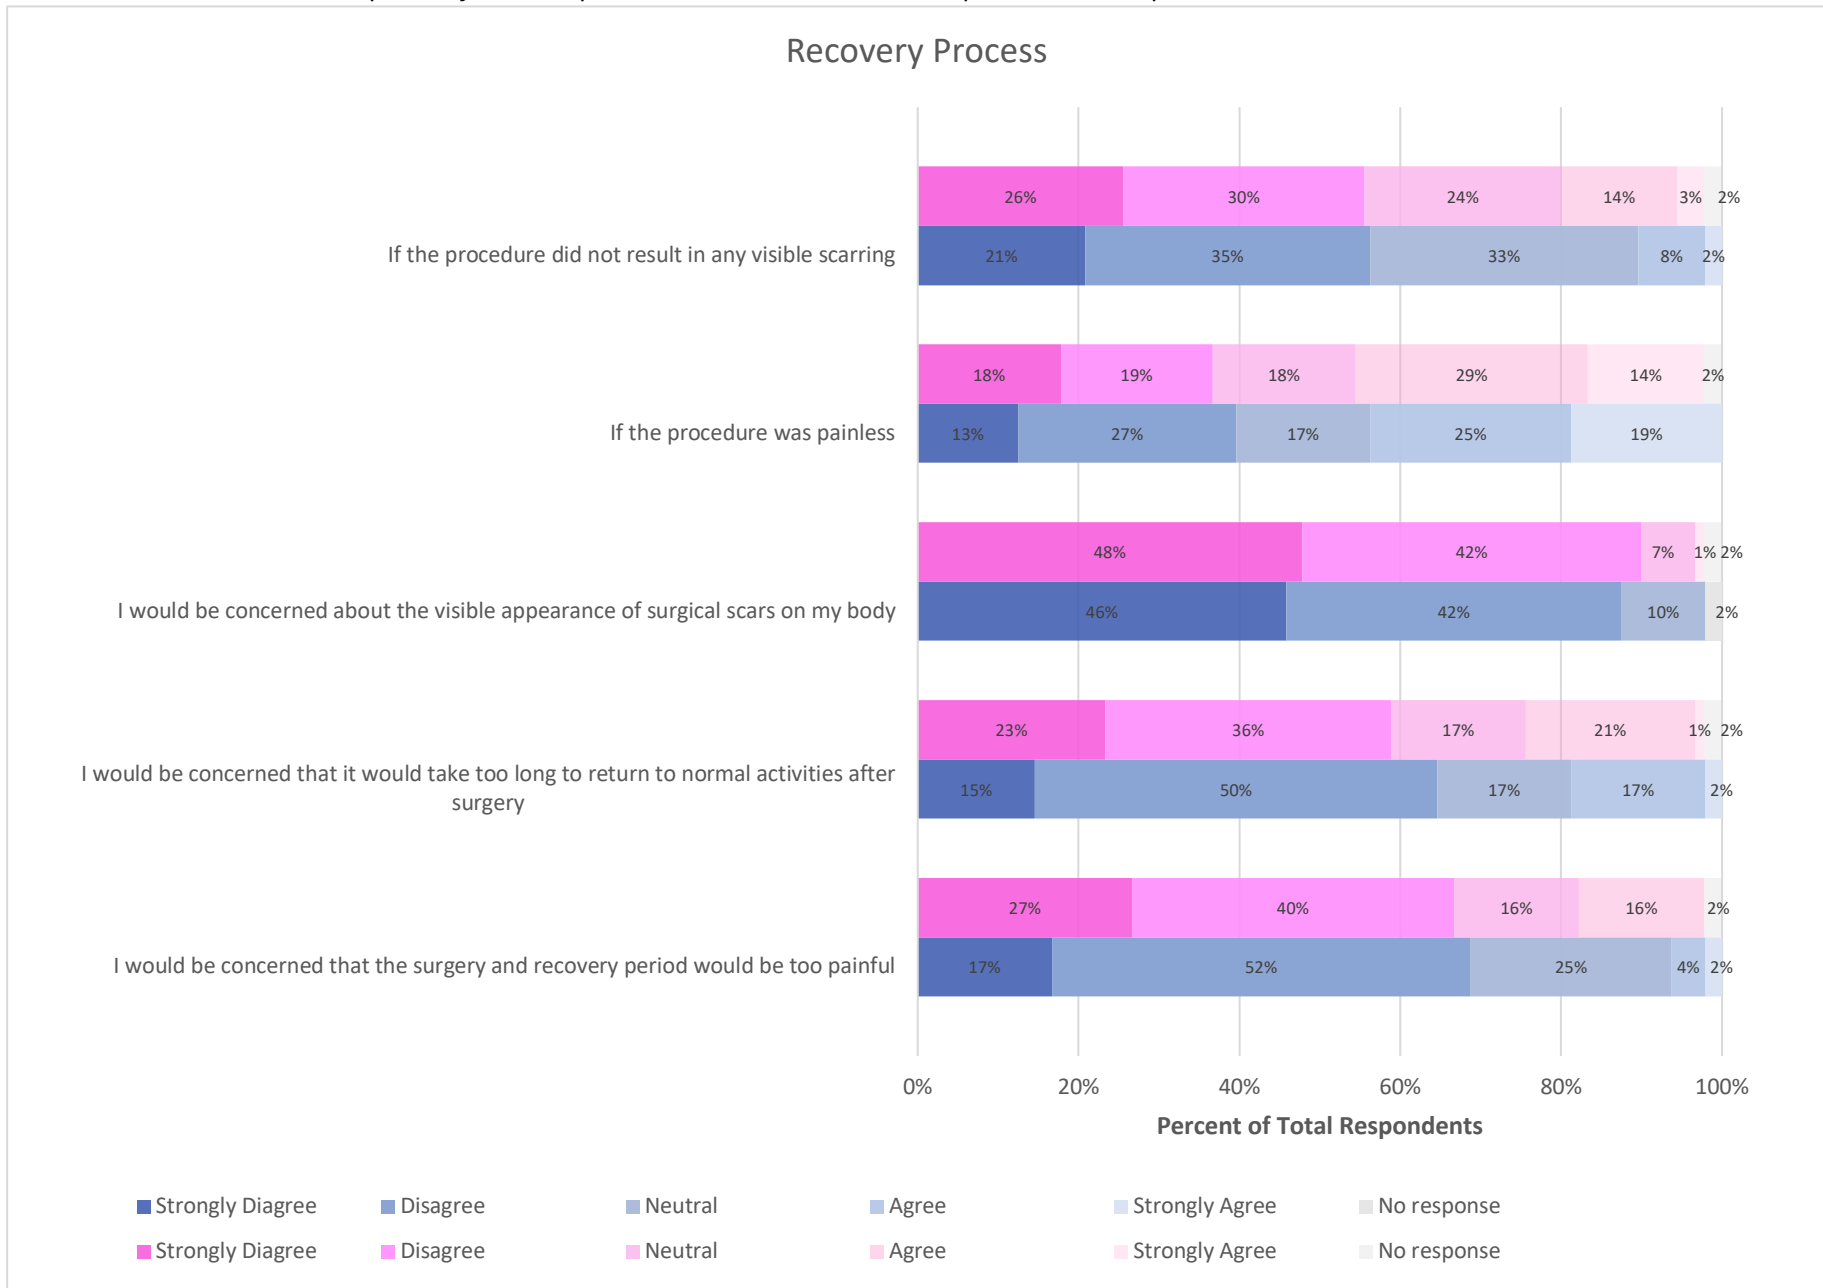

**Figure 2E: Motivators and Barriers in relation to Complications**

*Pink shaded bars represent female respondents and blue shaded bars represent male respondents.*

### Complications

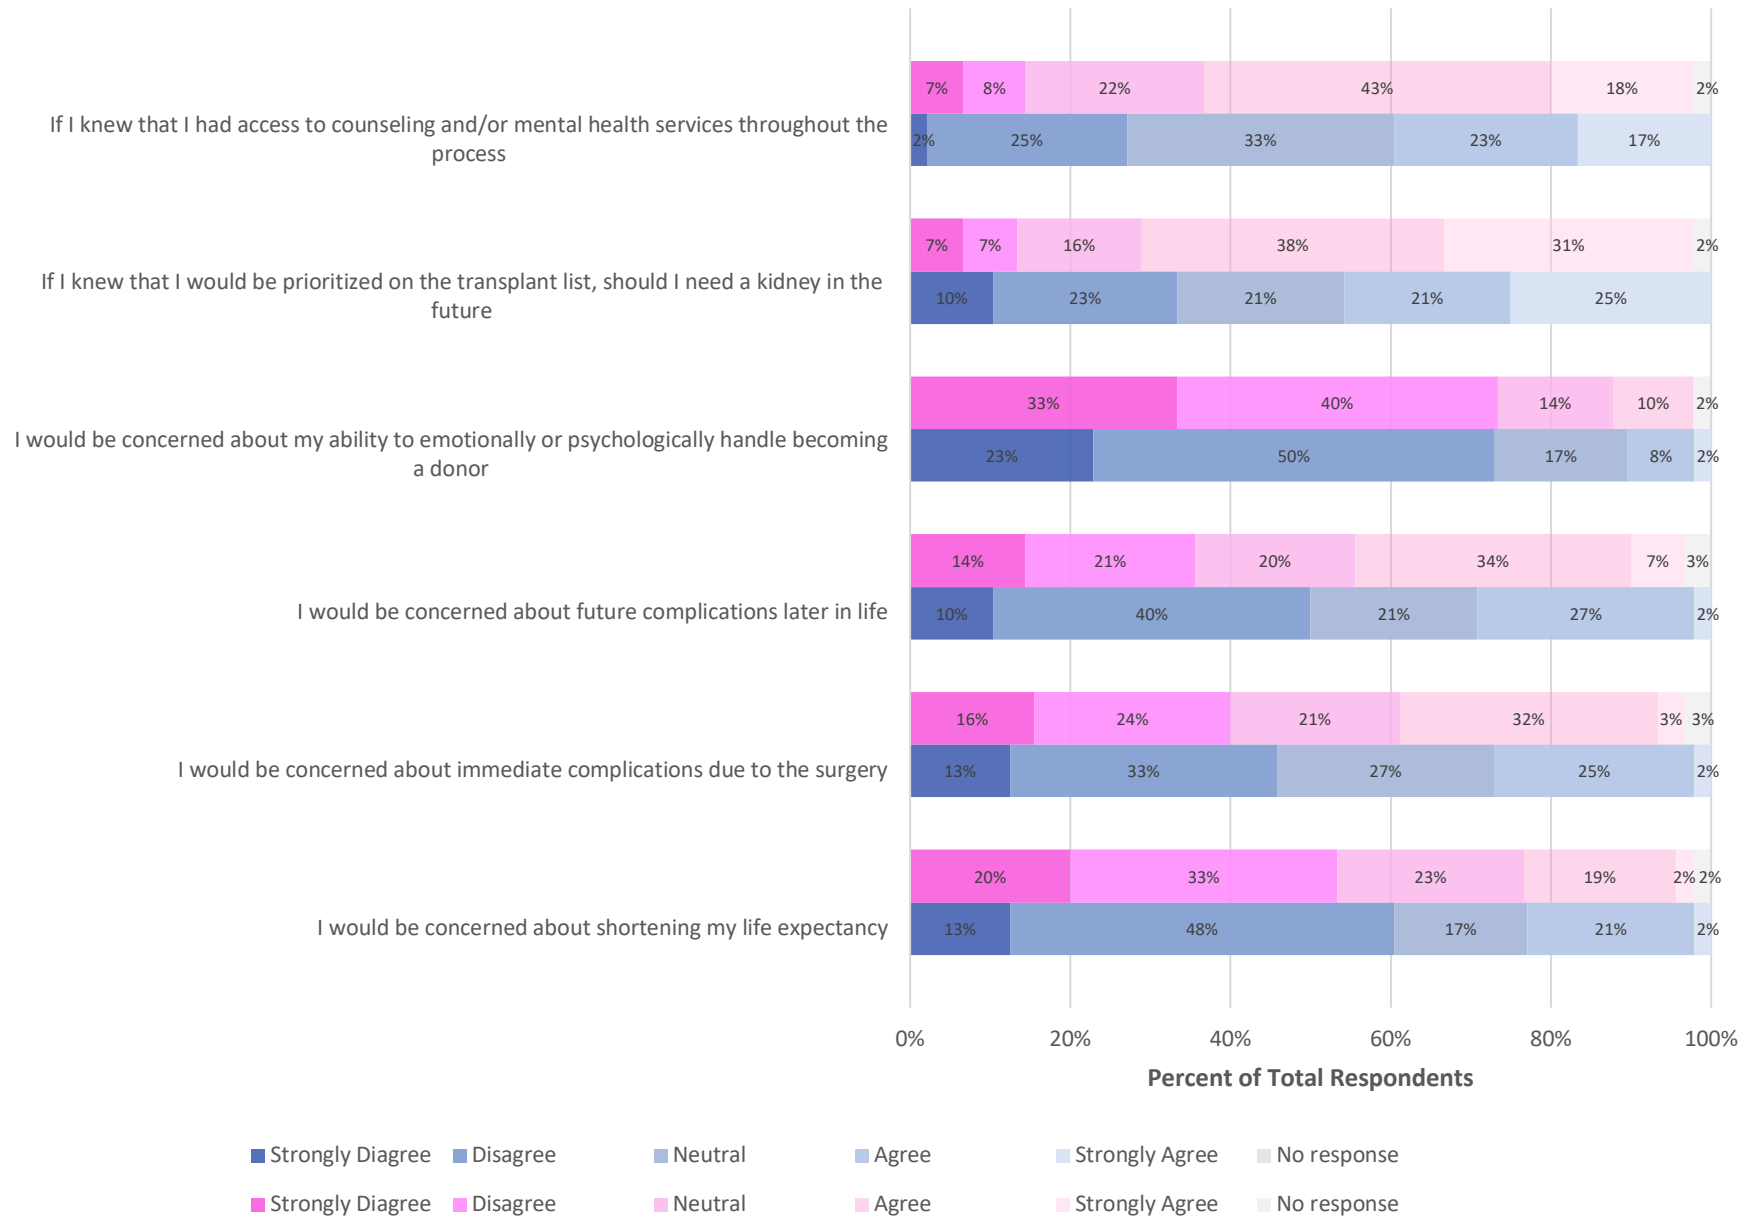



**Figure 3. Median Barrier & Motivator Scores**

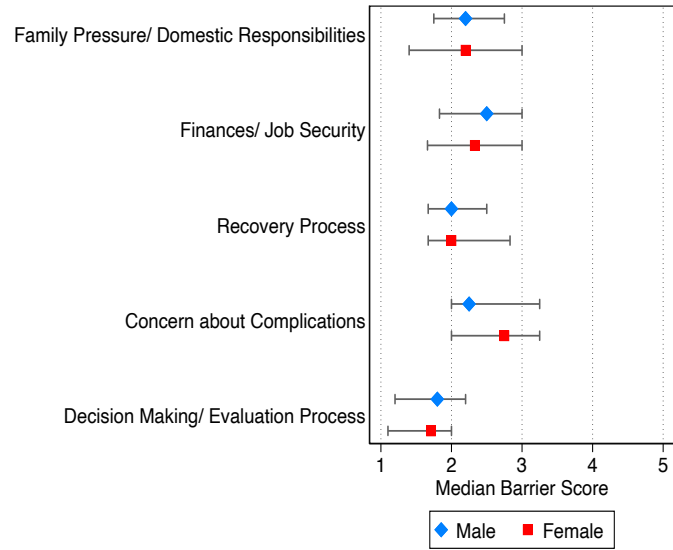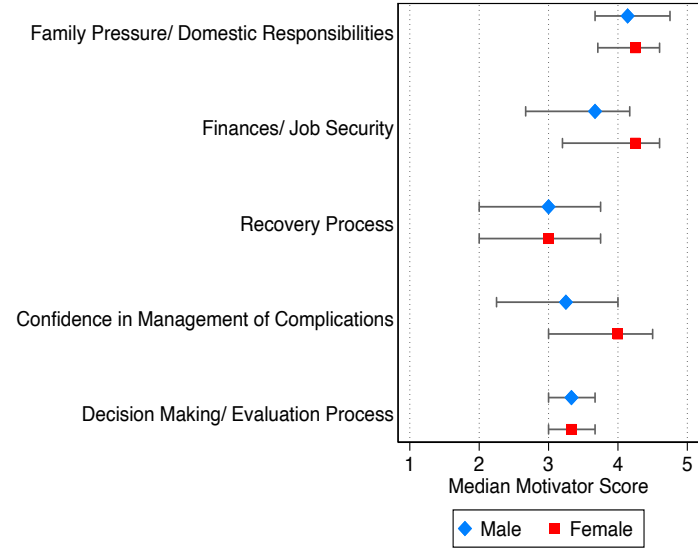

## Supplementary Figure 1: Knowledge of Living Donor Kidney Transplant

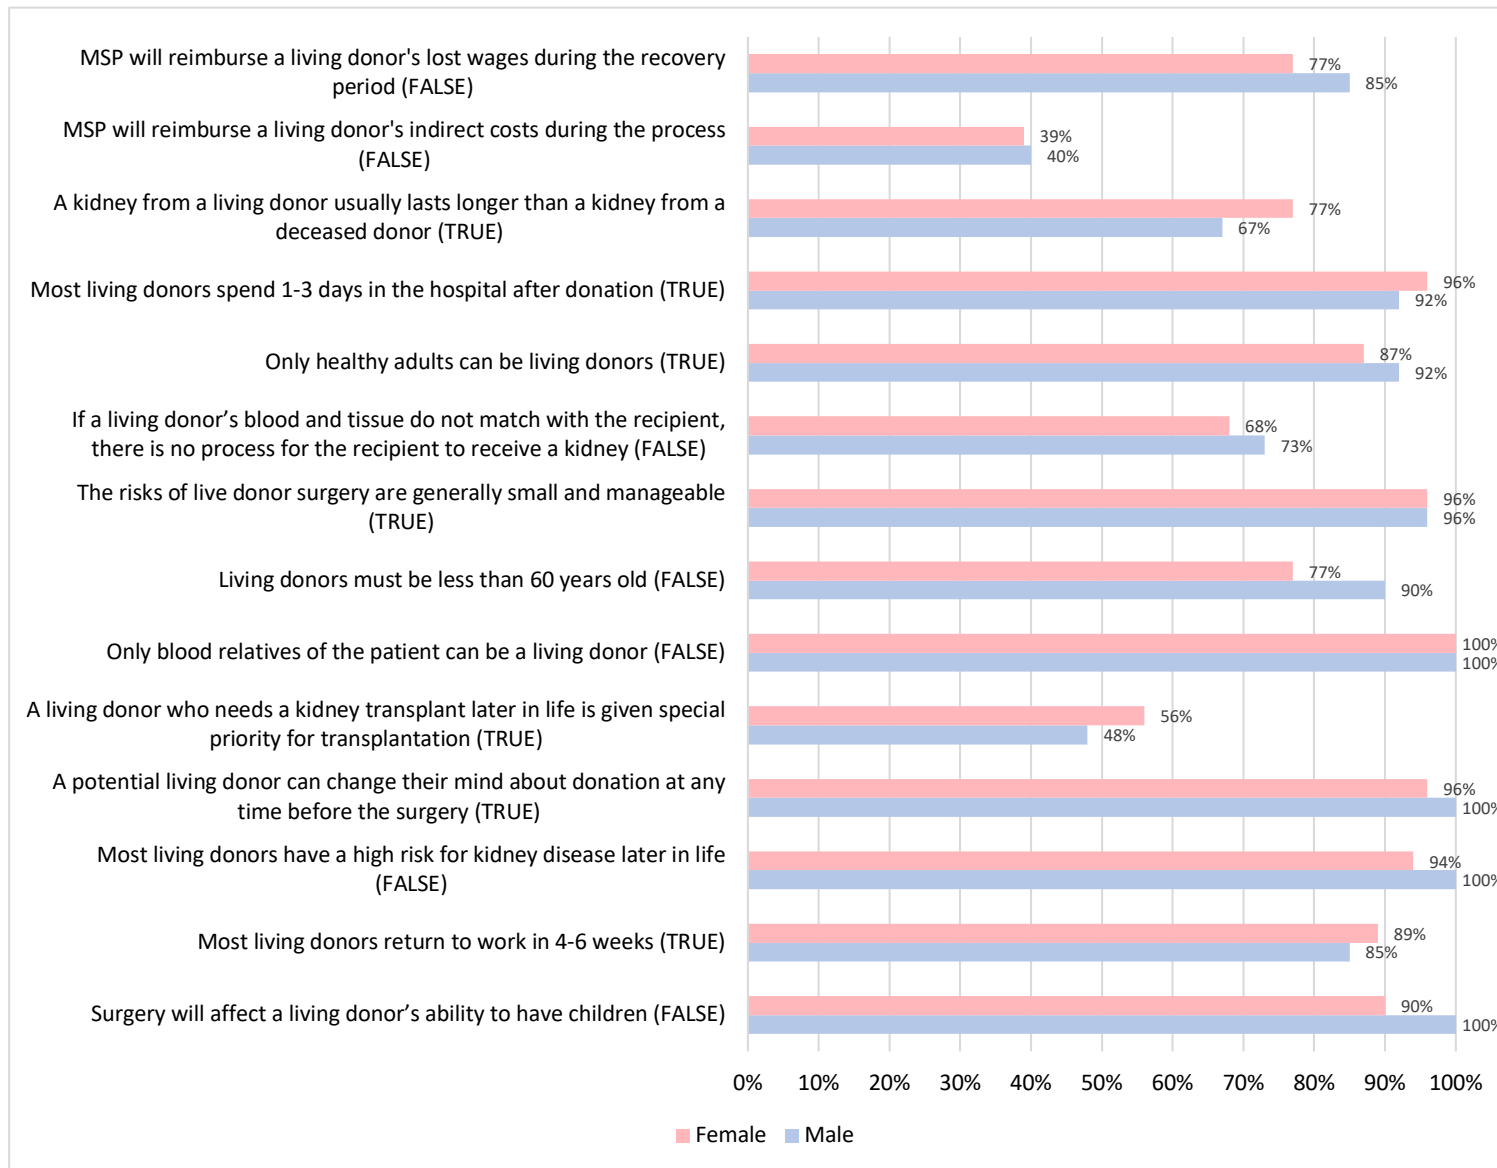

**Supplementary Table 1: Barrier & Motivation Scores**

| <i>Barrier Scores</i>                      | <b>Male</b>           |             | <b>Female</b>         |             |
|--------------------------------------------|-----------------------|-------------|-----------------------|-------------|
|                                            | <b>Median (Q2,Q3)</b> | <b>Mean</b> | <b>Median (Q2,Q3)</b> | <b>Mean</b> |
| Family Pressure/ Domestic Responsibilities | 2.2 (1.75-2.75)       | 2.26        | 2.2 (1.4-3)           | 2.18        |
| Finances/ Job Security                     | 2.5 (1.83-3)          | 2.41        | 2.33 (1.66-3)         | 2.47        |
| Recovery Process                           | 2 (1.67-2.5)          | 2.10        | 2 (1.67-2.83)         | 2.07        |
| Complications: Concern about Complications | 2.25 (2-3.25)         | 2.53        | 2.75 (2-3.25)         | 2.57        |
| Decision Making/ Evaluation Process        | 1.8 (1.2-2.2)         | 1.85        | 1.71 (1.1-2)          | 1.76        |

| <i>Motivation Scores</i>                                 | <b>Male</b>           |             | <b>Female</b>         |             |
|----------------------------------------------------------|-----------------------|-------------|-----------------------|-------------|
|                                                          | <b>Median (Q2,Q3)</b> | <b>Mean</b> | <b>Median (Q2,Q3)</b> | <b>Mean</b> |
| Family Pressure/ Domestic Responsibilities               | 4.14 (3.67-4.75)      | 4.01        | 4.25 (3.71-4.6)       | 3.96        |
| Finances/ Job Security                                   | 3.67 (2.67-4.17)      | 3.40        | 4 (3.2-4.5)           | 3.77        |
| Recovery Process                                         | 3 (2-3.75)            | 2.73        | 3 (2-3.75)            | 2.71        |
| Complications: Confidence in Management in Complications | 3.25 (2.25-4)         | 3.27        | 4 (3-4.5)             | 3.70        |
| Decision Making/ Evaluation Process                      | 3.33 (3-3.67)         | 3.21        | 3.33 (3-3.67)         | 3.11        |
